# Supplementary material for: High-quality β-(AlxGa1−x)2O3 thin films on sapphire substrates by face-to-face annealing
Source: Royal Society of Chemistry journal article supplement (doi:10.1039/d4ce00263f), 2024-01-01
Supplement: d4ce00263f1.pdf [file d4ce00263f1.pdf]

## Supplementary Information for

### High-quality $\beta$ -(Al<sub>x</sub>Ga<sub>1-x</sub>)<sub>2</sub>O<sub>3</sub> thin films on sapphire substrate by face-to-face annealing

Songhao Wu,<sup>a,b</sup> Chicheng Ma,<sup>b,c</sup> Han Yang,<sup>a,b</sup> Zichun Liu,<sup>a,b</sup> Yuanxiao Ma,<sup>a\*</sup> Ran Yao,<sup>b,c</sup> Yiyun Zhang,<sup>b,c\*</sup> Hua Yang,<sup>b,c</sup> Xiaoyan Yi,<sup>b,c</sup> Junxi Wang,<sup>b,c</sup> and Yeliang Wang<sup>a\*</sup>

<sup>a</sup>The School of Integrated Circuits and Electronics and Yangtze Delta Region Academy, Beijing Institute of Technology, Beijing 100081, China

<sup>b</sup>R&D Center for Solid-state Lighting, Institute of Semiconductors, Chinese Academy of Sciences, Beijing 100083, China

<sup>c</sup>Center of Materials Science and Optoelectronics Engineering, University of Chinese Academy of Sciences, Beijing 100049, China

E-mail: [yyzhang@semi.ac.cn](mailto:yyzhang@semi.ac.cn), [yxma@bit.edu.cn](mailto:yxma@bit.edu.cn), and [yeliang.wang@bit.edu.cn](mailto:yeliang.wang@bit.edu.cn)

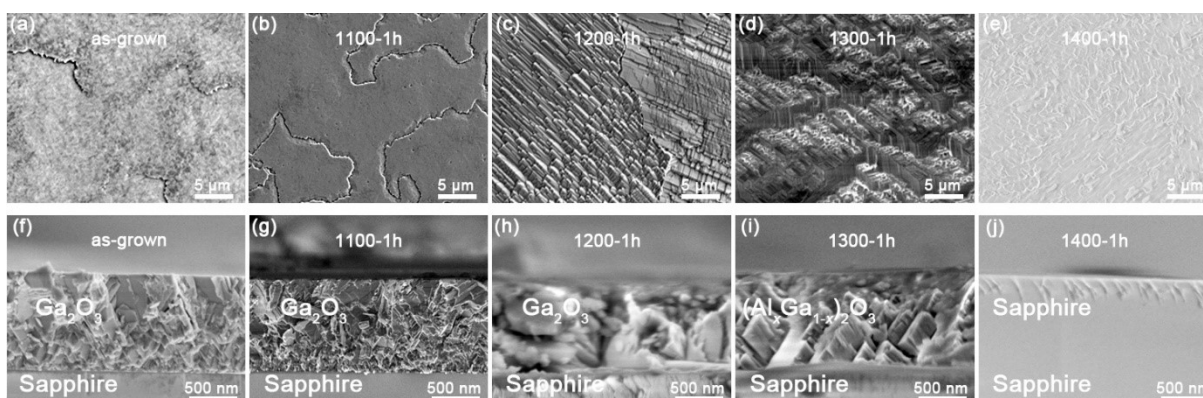

**Fig. 1.** The (a, b, c, d, e) surface and (f, g, h, i, j) cross-sectional SEM images of the as-grown, 1100-1h, 1200-1h, 1300-1h and 1400-1h samples.

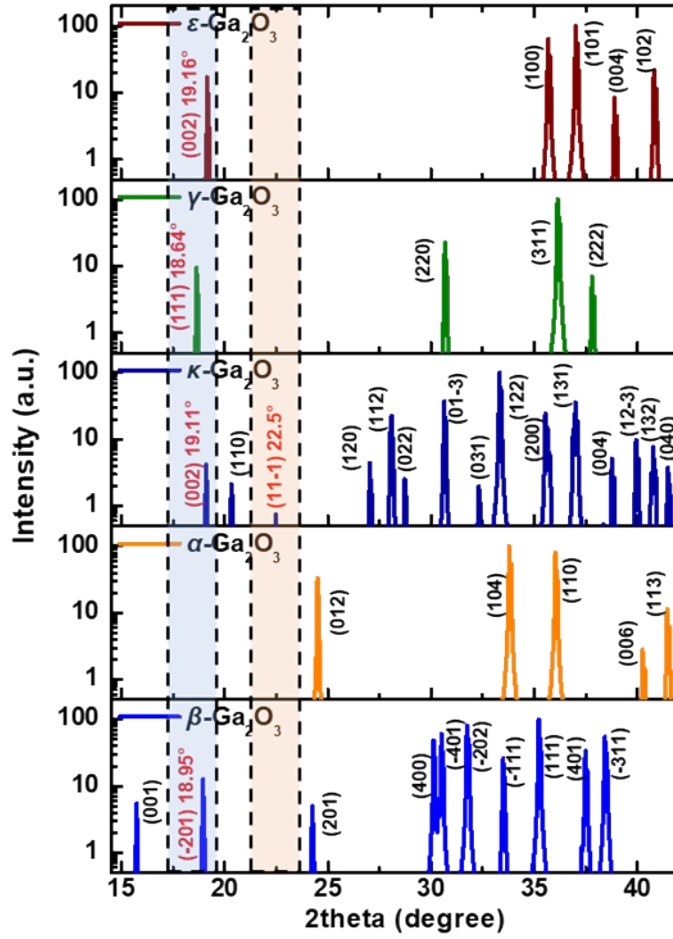

**Fig. 2.** The standard  $\beta$ ,  $\alpha$ ,  $\kappa$ ,  $\gamma$ ,  $\varepsilon$ -Ga<sub>2</sub>O<sub>3</sub> XRD diffraction peak patterns. The data is sourced from the SpringerMaterials crystal database, with the corresponding numbers for each isomorph as follows:  $\beta$ -Ga<sub>2</sub>O<sub>3</sub>: sd\_1413271,  $\alpha$ -Ga<sub>2</sub>O<sub>3</sub>: sd\_1812181,  $\kappa$ -Ga<sub>2</sub>O<sub>3</sub>: sd\_1043676,  $\gamma$ -Ga<sub>2</sub>O<sub>3</sub>: sd\_1638490,  $\varepsilon$ -Ga<sub>2</sub>O<sub>3</sub>: sd\_1638493.

**Table. 1** The (-201) and (300) peak's FWHM of the as-grown, 1100-1h, 1200-1h 1300-1h, 1300-2h, 1300-3h and 1300-4h.

| Samples  | FWHM (°) |
|----------|----------|
| as-grown | 2.05     |
| 1100-1h  | 2.00     |
| 1200-1h  | 1.87     |
| 1300-1h  | NA       |
| 1300-2h  | 0.94     |
| 1300-3h  | 0.60     |
| 1300-4h  | 0.08     |
